# Supplementary material for: Hyaluronan derivatives bearing variable densities of ferulic acid residues
Source: Royal Society of Chemistry journal article supplement (doi:10.1039/c3tb21824d), 2014-01-01
Supplement: c3tb21824d1.pdf [file c3tb21824d1.pdf]

## Electronic Supplementary Information

### Hyaluronan Derivatives Bearing Variable Densities of Ferulic Acid Residues

**Andrea Cappelli,<sup>\*,a</sup> Giorgio Grisci,<sup>a</sup> Marco Paolino,<sup>a</sup> Germano Giuliani,<sup>a</sup> Alessandro Donati,<sup>a</sup>  
Raniero Mendichi,<sup>b</sup> Roberto Artusi,<sup>c</sup> Mario Demiranda,<sup>c</sup> Andrea Zanardi,<sup>c</sup> Gianluca Giorgi,<sup>a</sup>  
Salvatore Vomero.<sup>a</sup>**

<sup>a</sup>Dipartimento di Biotecnologie, Chimica e Farmacia and European Research Centre for Drug Discovery and Development, Università degli Studi di Siena, Via A. Moro 2, 53100 Siena, Italy

<sup>b</sup>Istituto per lo Studio delle Macromolecole (CNR), Via E. Bassini 15, 20133 Milano, Italy

<sup>c</sup>Rottapharm Madaus, Via Valosa di Sopra 7, 20900 Monza, Italy

|          |                                                                                     |                 |
|----------|-------------------------------------------------------------------------------------|-----------------|
| Content: | NMR spectra of activated intermediate <b>2</b>                                      | (pages 2 and 3) |
|          | NMR spectra of activated intermediate <b>3</b>                                      | (pages 4 and 5) |
|          | NMR spectra of benzyl ferulate <b>5</b>                                             | (page 6)        |
|          | MWD and conformational features of the native <b>HA</b> and <b>HAFa</b> derivatives | (pages 7-9)     |
|          | Crystal data for compound <b>2</b>                                                  | (pages 10-13).  |

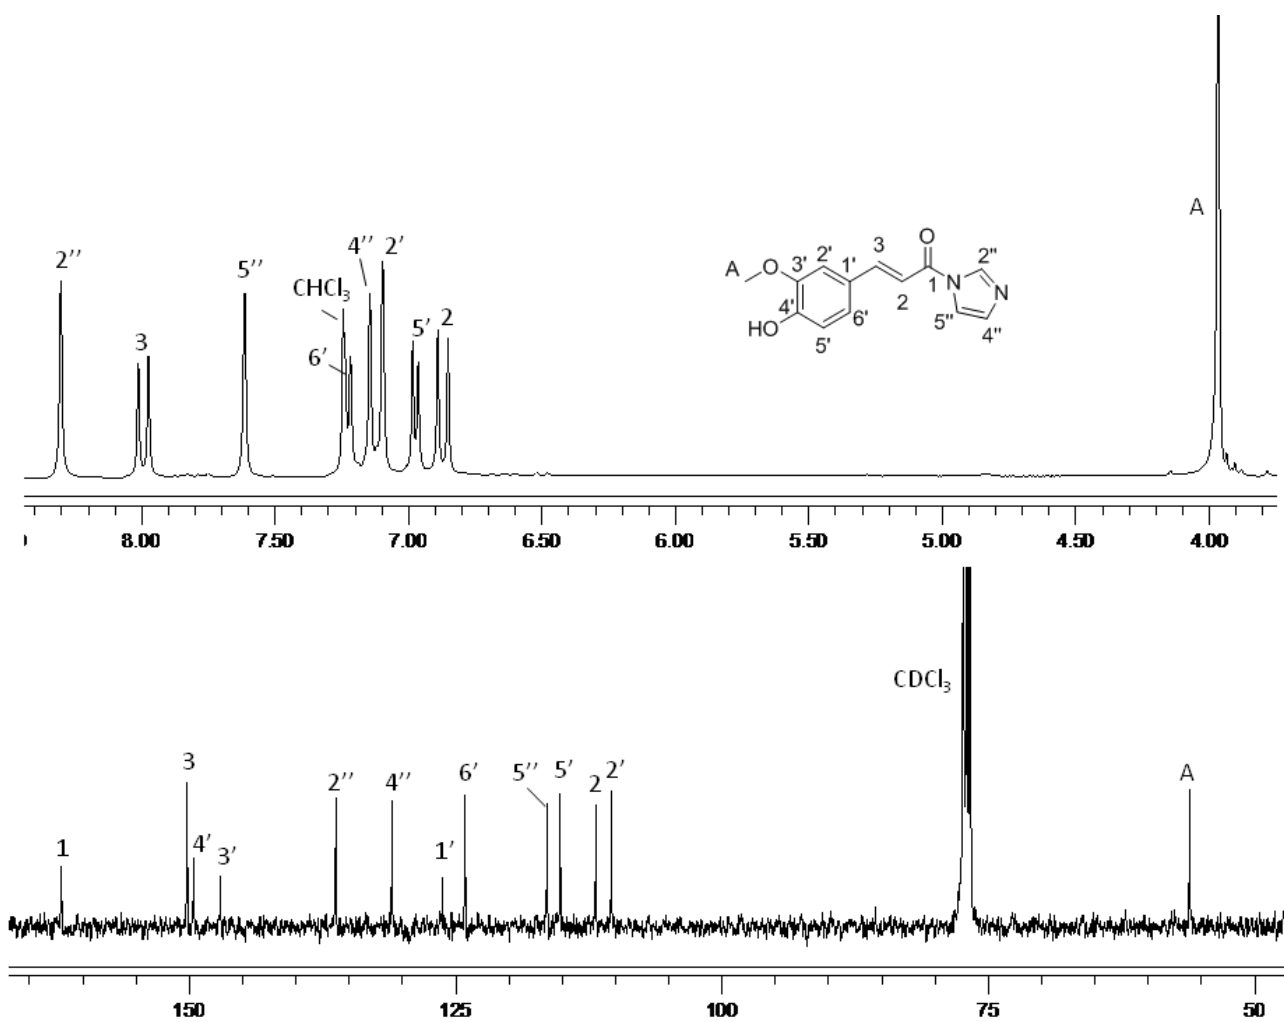

**Figure ESI-1.** NMR spectra of compound 2 in CDCl<sub>3</sub>. CHCl<sub>3</sub> and CDCl<sub>3</sub> indicate the solvent peaks.

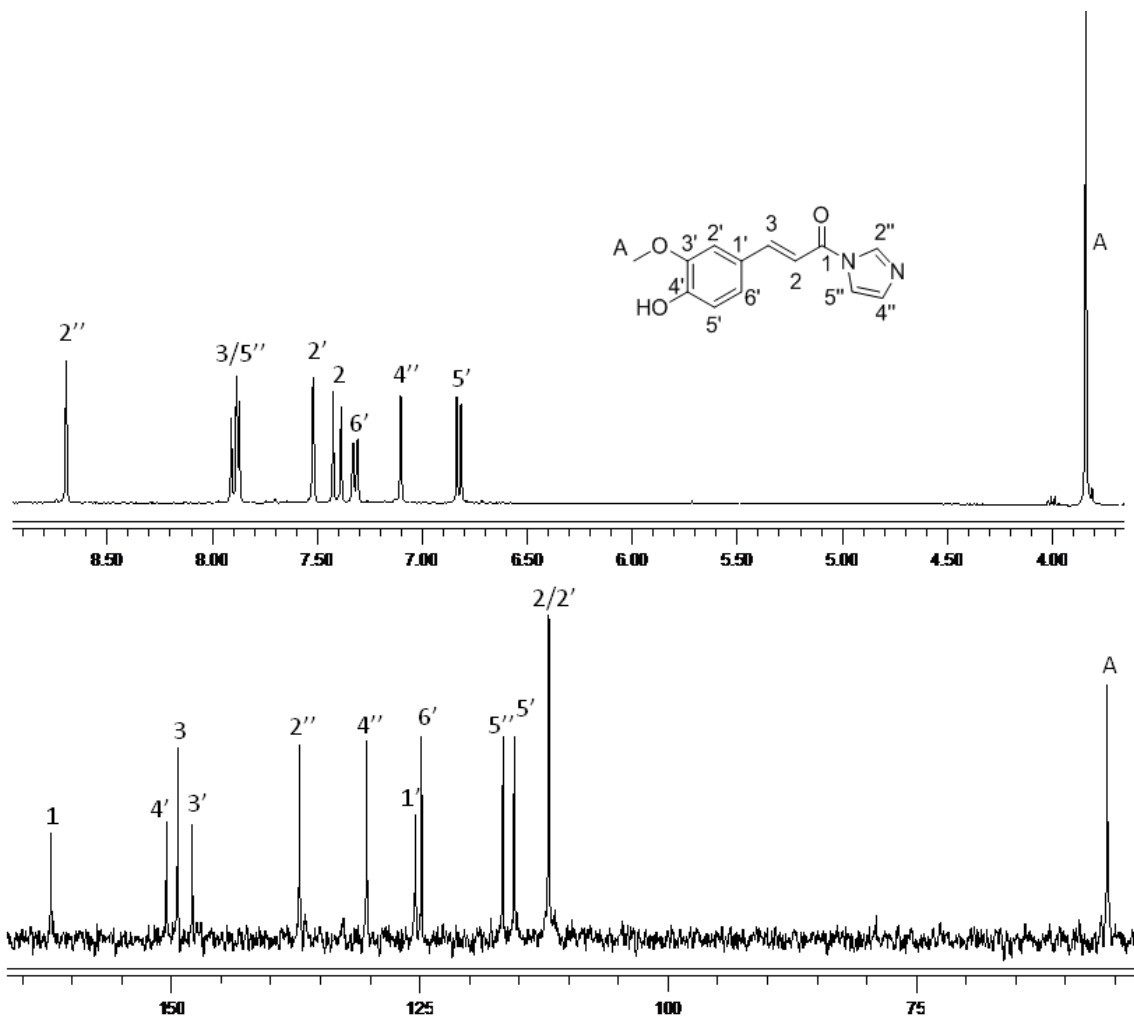

**Figure ESI-2.** NMR spectra of compound 2 in DMSO-d<sub>6</sub>.

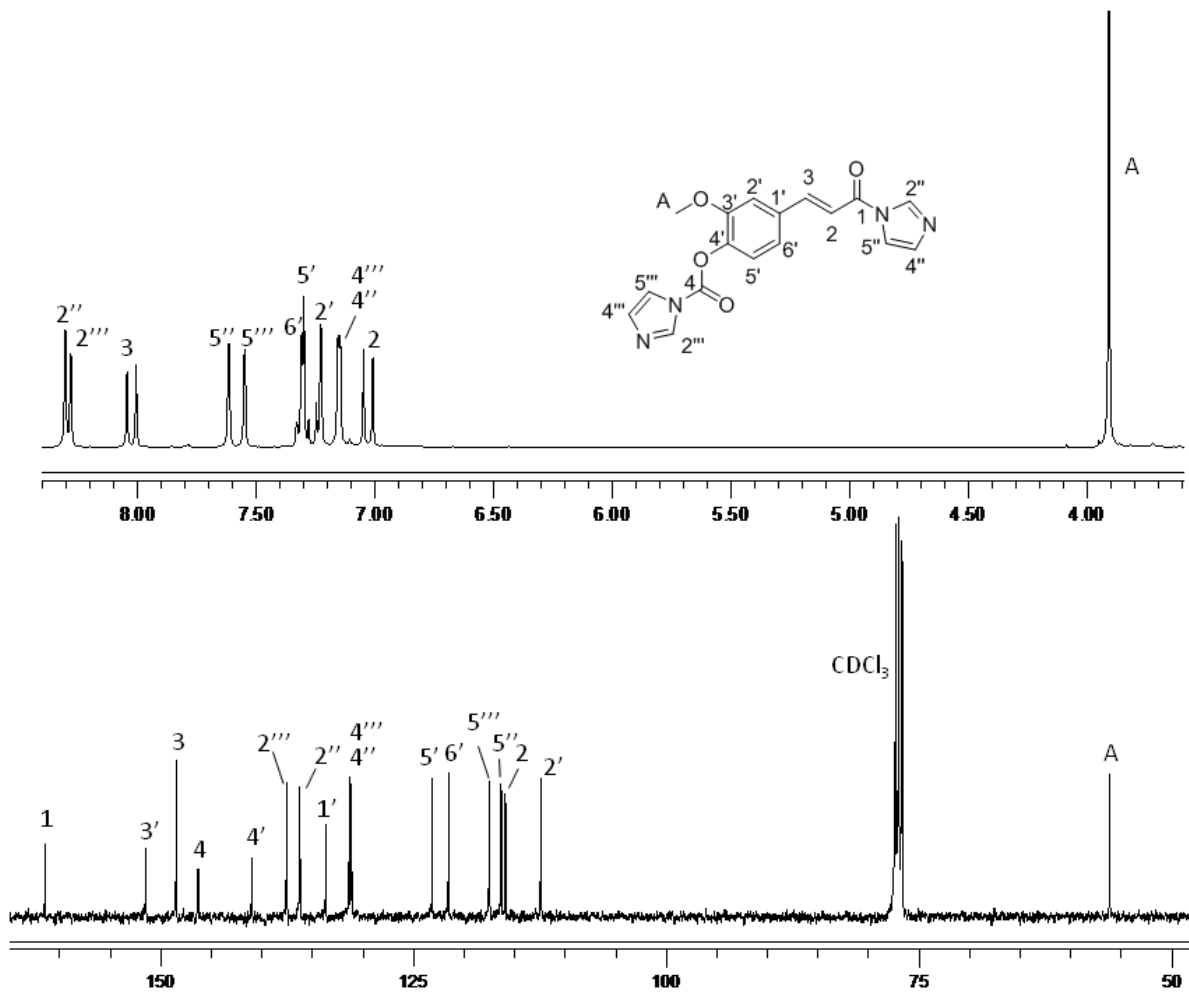

**Figure ESI-3.** NMR spectra of compound **3** in CDCl<sub>3</sub>. CDCl<sub>3</sub> indicates the solvent peak.

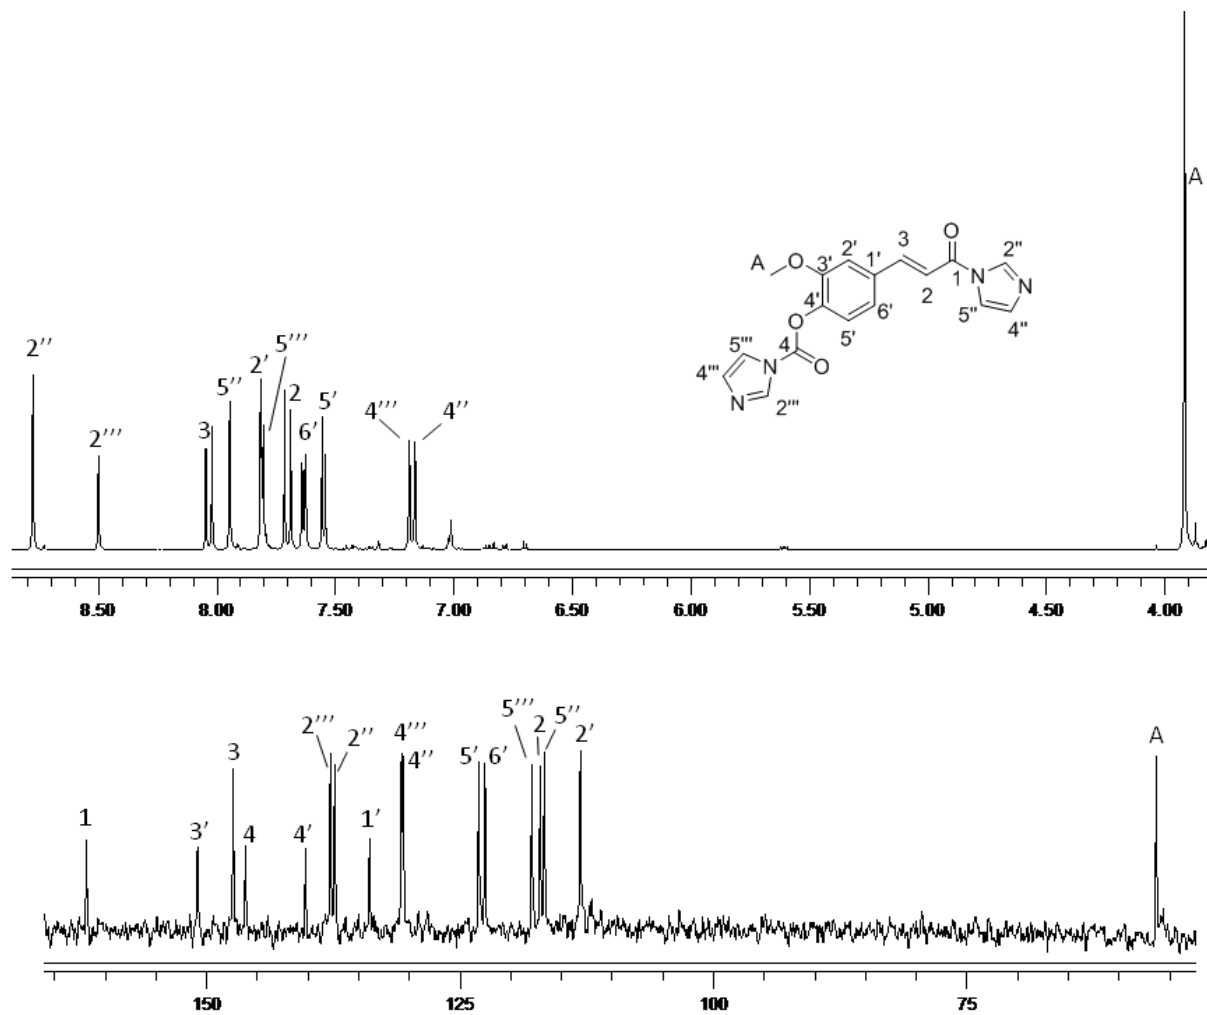

**Figure ESI-4.** NMR spectra of compound 3 in DMSO-d<sub>6</sub>.

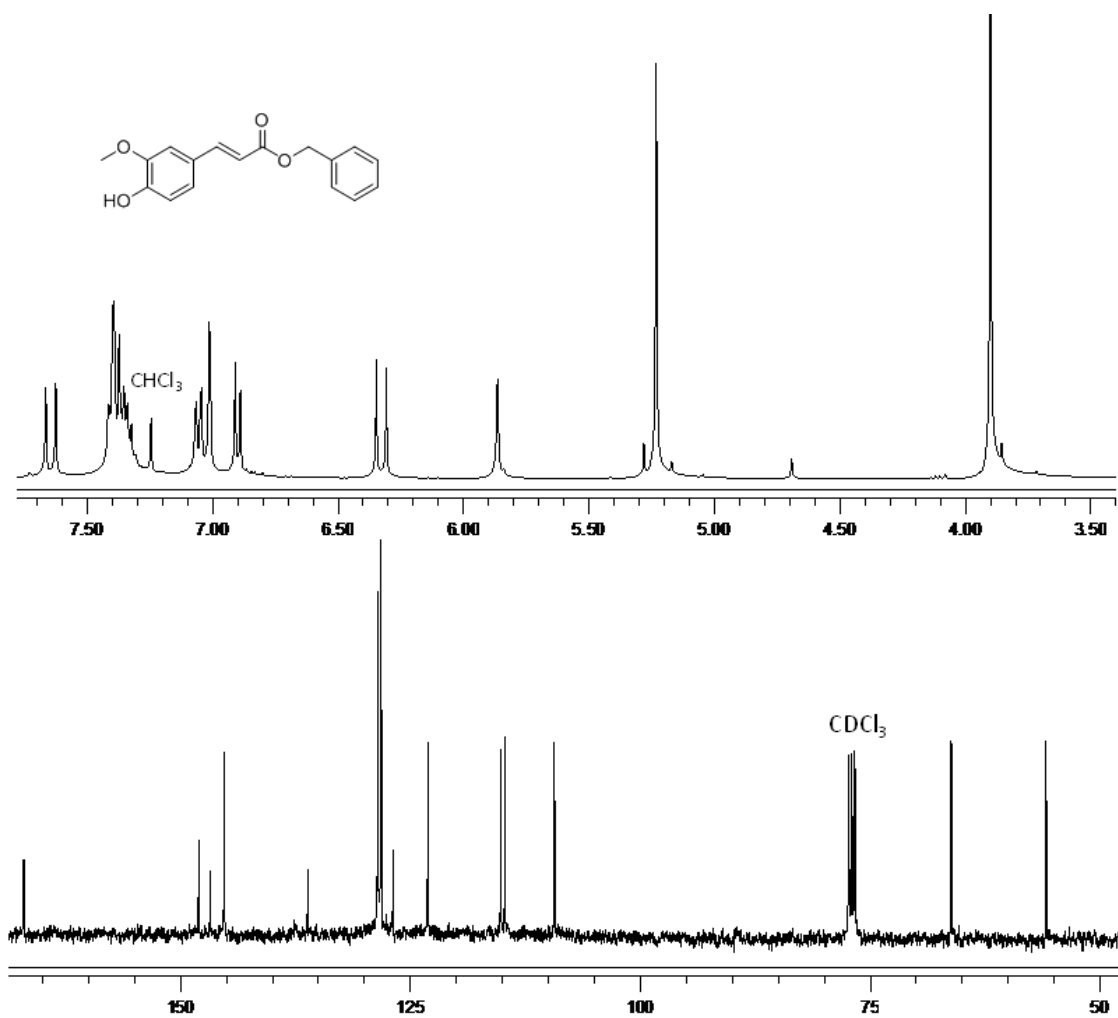

**Figure ESI-5.** NMR spectra of benzyl ferulate **5** in CDCl<sub>3</sub>. CHCl<sub>3</sub> and CDCl<sub>3</sub> indicate the solvent peaks.

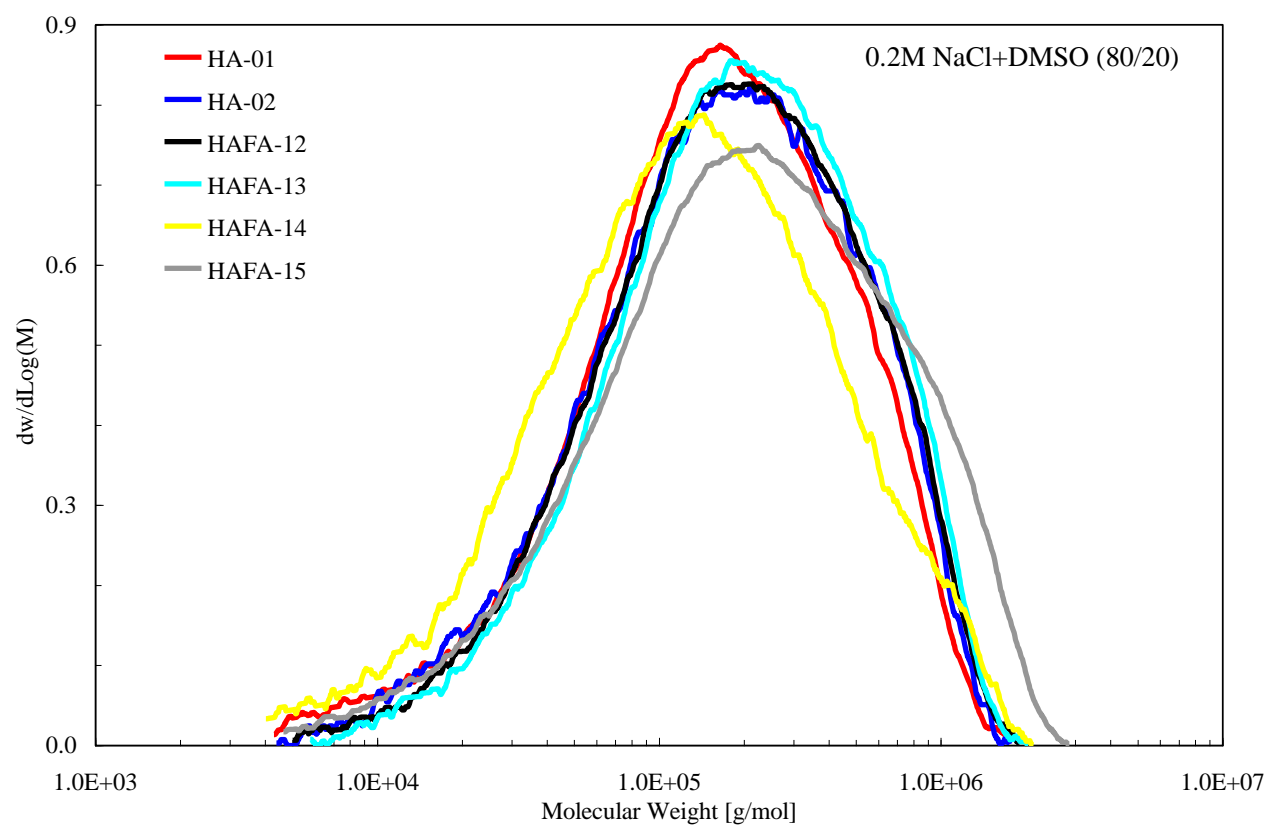

**Figure ESI-6.** Comparison of differential MWD of the two native **HA** and of four **HAFA** derivatives.

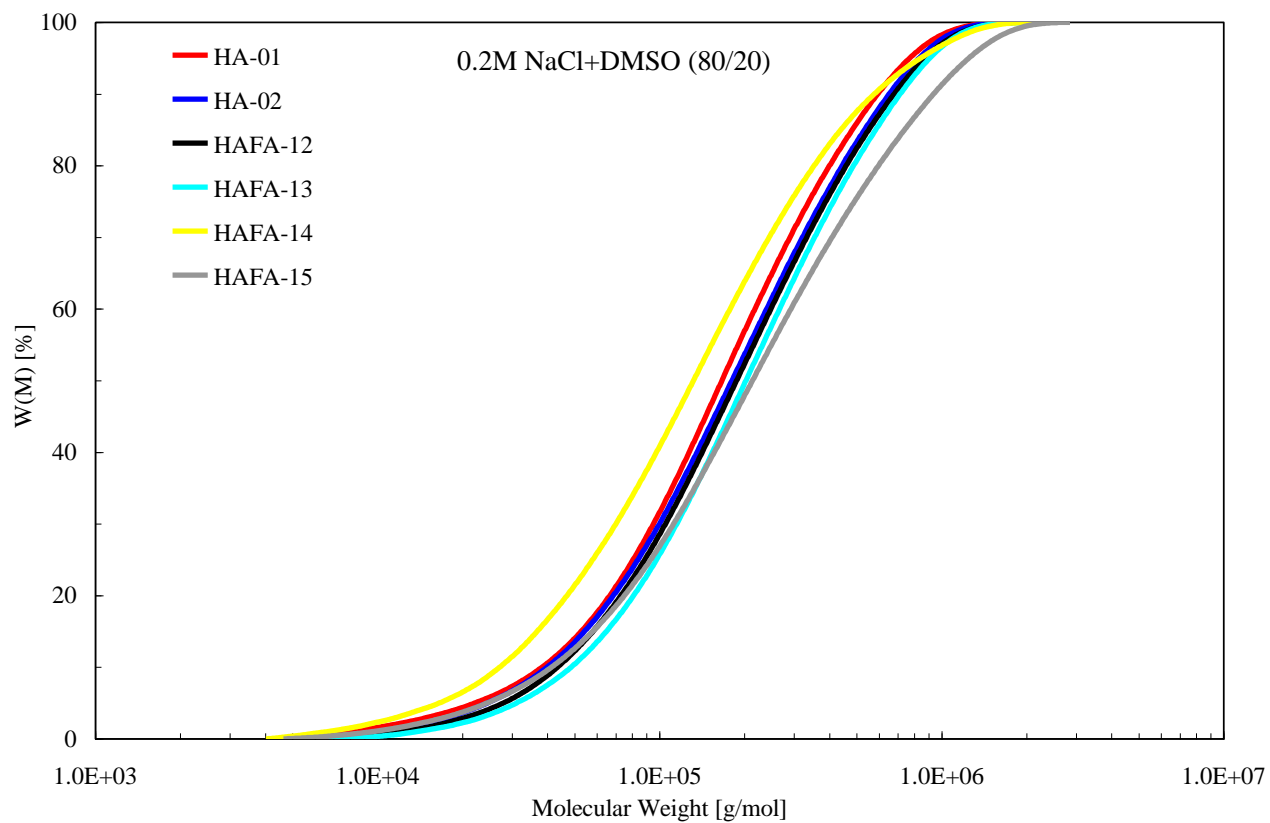

**Figure ESI-7.** Comparison of the cumulative MWD of the two native **HA** and of four **HAFA** derivatives.



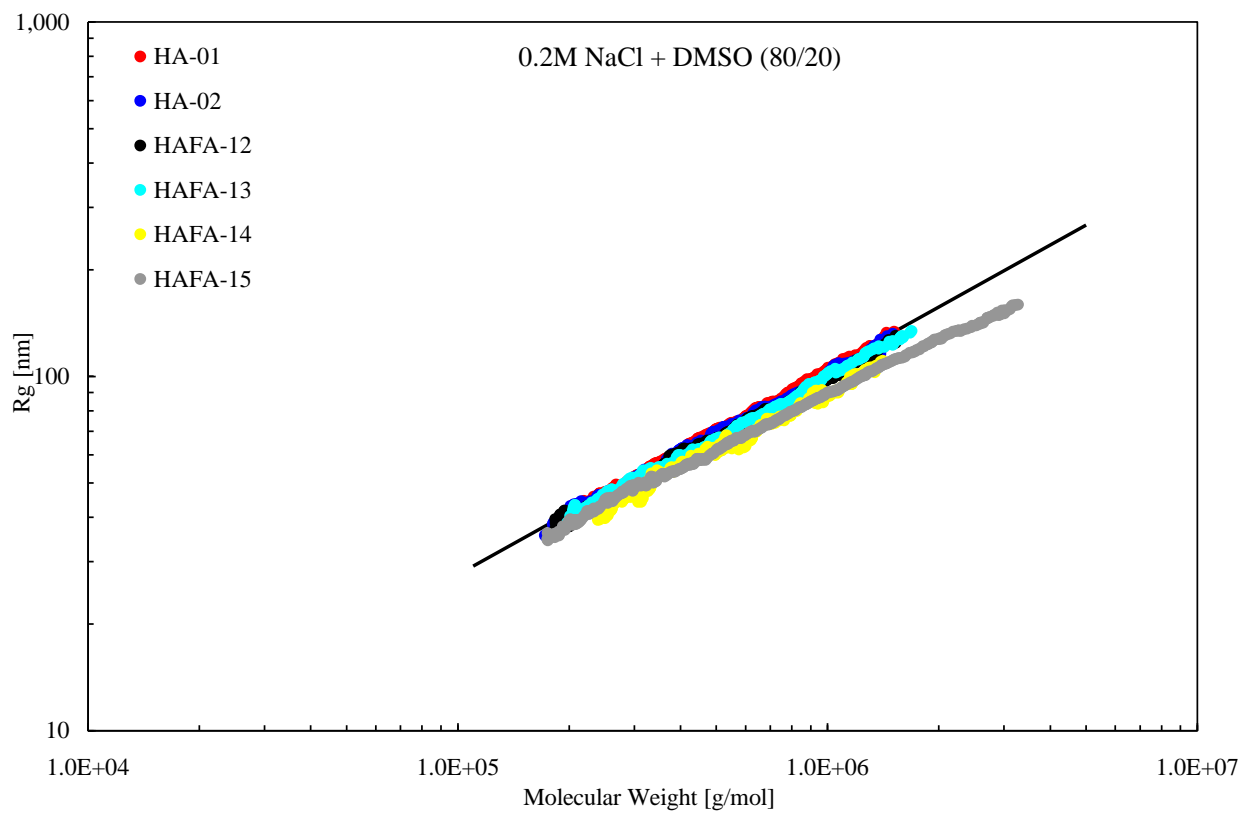

**Figure ESI-8.** Comparison of the conformation plots of native **HA** and selected **HAFA** derivatives.

**Table ESI-1.** Crystal data and structure refinement for compound **2**.

|                                   |                                             |                               |
|-----------------------------------|---------------------------------------------|-------------------------------|
| Empirical formula                 | C13 H12 N2 O3                               |                               |
| Formula weight                    | 244.25                                      |                               |
| Temperature                       | 293(2) K                                    |                               |
| Wavelength                        | 0.71073 Å                                   |                               |
| Crystal system                    | Monoclinic                                  |                               |
| Space group                       | P 21/n                                      |                               |
| Unit cell dimensions              | a = 9.1833(10) Å                            | $\alpha = 90^\circ$ .         |
|                                   | b = 10.8772(10) Å                           | $\beta = 106.907(11)^\circ$ . |
|                                   | c = 12.2834(16) Å                           | $\gamma = 90^\circ$ .         |
| Volume                            | 1173.9(2) Å <sup>3</sup>                    |                               |
| Z                                 | 4                                           |                               |
| Density (calculated)              | 1.382 Mg/m <sup>3</sup>                     |                               |
| Absorption coefficient            | 0.100 mm <sup>-1</sup>                      |                               |
| F(000)                            | 512                                         |                               |
| Crystal size                      | 0.5 × 0.5 × 0.3 mm <sup>3</sup>             |                               |
| Theta range for data collection   | 2.46 to 29.11°.                             |                               |
| Index ranges                      | -8 ≤ h ≤ 12, -14 ≤ k ≤ 13, -16 ≤ l ≤ 16     |                               |
| Reflections collected             | 8625                                        |                               |
| Independent reflections           | 2752 [R(int) = 0.0970]                      |                               |
| Completeness to theta = 29.11°    | 87.2 %                                      |                               |
| Absorption correction             | Semi-empirical from equivalents             |                               |
| Max. and min. transmission        | 1.00000 and 0.66873                         |                               |
| Refinement method                 | Full-matrix least-squares on F <sup>2</sup> |                               |
| Data / restraints / parameters    | 2752 / 0 / 165                              |                               |
| Goodness-of-fit on F <sup>2</sup> | 1.002                                       |                               |
| Final R indices [I > 2σ(I)]       | R1 = 0.0769, wR2 = 0.1065                   |                               |
| R indices (all data)              | R1 = 0.2189, wR2 = 0.1454                   |                               |
| Largest diff. peak and hole       | 0.169 and -0.168 e.Å <sup>-3</sup>          |                               |

**Table ESI-2.** Atomic coordinates ( $\times 10^4$ ) and equivalent isotropic displacement parameters ( $\text{\AA}^2 \times 10^3$ ) for compound **2**.  $U(\text{eq})$  is defined as one third of the trace of the orthogonalized  $U_{ij}$  tensor.

|       | x        | y       | z       | U(eq) |
|-------|----------|---------|---------|-------|
| N(1)  | 799(3)   | 2082(2) | 1401(2) | 46(1) |
| C(2)  | -569(4)  | 1657(3) | 731(3)  | 51(1) |
| N(3)  | -1573(3) | 2518(3) | 406(2)  | 59(1) |
| C(4)  | -816(4)  | 3572(3) | 886(3)  | 76(1) |
| C(5)  | 611(4)   | 3335(3) | 1494(3) | 71(1) |
| C(6)  | 2122(4)  | 1340(3) | 1796(3) | 45(1) |
| O(1)  | 2022(2)  | 248(2)  | 1552(2) | 59(1) |
| C(7)  | 3513(4)  | 1950(3) | 2459(3) | 49(1) |
| C(8)  | 4873(4)  | 1469(3) | 2561(3) | 49(1) |
| C(1') | 6351(4)  | 1981(3) | 3162(3) | 43(1) |
| C(2') | 7676(4)  | 1328(3) | 3197(2) | 48(1) |
| C(3') | 9098(4)  | 1768(3) | 3766(3) | 45(1) |
| C(4') | 9233(4)  | 2929(3) | 4280(3) | 50(1) |
| C(5') | 7949(4)  | 3583(3) | 4256(3) | 53(1) |
| C(6') | 6521(4)  | 3106(3) | 3723(3) | 50(1) |
| O(2)  | 10455(3) | 1171(2) | 3902(2) | 63(1) |
| C(9)  | 10403(4) | -97(3)  | 3643(3) | 69(1) |
| O(3)  | 10608(3) | 3417(2) | 4838(2) | 75(1) |

**Table ESI-3.** Bond lengths [Å] and angles [°] for non-H atoms of compound **2**.

---

|             |          |                   |          |
|-------------|----------|-------------------|----------|
| N(1)-C(2)   | 1.367(3) | C(2)-N(1)-C(5)    | 105.6(3) |
| N(1)-C(5)   | 1.383(4) | C(2)-N(1)-C(6)    | 123.9(3) |
| N(1)-C(6)   | 1.421(4) | C(5)-N(1)-C(6)    | 130.3(3) |
| C(2)-N(3)   | 1.293(4) | N(3)-C(2)-N(1)    | 112.8(3) |
| N(3)-C(4)   | 1.381(4) | C(2)-N(3)-C(4)    | 104.2(3) |
| C(4)-C(5)   | 1.331(4) | C(5)-C(4)-N(3)    | 111.7(3) |
| C(6)-O(1)   | 1.222(3) | C(4)-C(5)-N(1)    | 105.7(3) |
| C(6)-C(7)   | 1.460(4) | O(1)-C(6)-N(1)    | 118.2(3) |
| C(7)-C(8)   | 1.327(4) | O(1)-C(6)-C(7)    | 124.7(3) |
| C(8)-C(1')  | 1.454(4) | N(1)-C(6)-C(7)    | 117.0(3) |
| C(1')-C(6') | 1.391(4) | C(8)-C(7)-C(6)    | 121.3(3) |
| C(1')-C(2') | 1.399(4) | C(7)-C(8)-C(1')   | 127.6(3) |
| C(2')-C(3') | 1.376(4) | C(6')-C(1')-C(2') | 117.4(3) |
| C(3')-O(2)  | 1.371(4) | C(6')-C(1')-C(8)  | 122.8(3) |
| C(3')-C(4') | 1.401(4) | C(2')-C(1')-C(8)  | 119.7(3) |
| C(4')-O(3)  | 1.357(4) | C(3')-C(2')-C(1') | 121.8(3) |
| C(4')-C(5') | 1.370(4) | O(2)-C(3')-C(2')  | 126.2(3) |
| C(5')-C(6') | 1.385(4) | O(2)-C(3')-C(4')  | 114.5(3) |
| O(2)-C(9)   | 1.414(3) | C(2')-C(3')-C(4') | 119.3(3) |
|             |          | O(3)-C(4')-C(5')  | 118.5(3) |
|             |          | O(3)-C(4')-C(3')  | 121.8(3) |
|             |          | C(5')-C(4')-C(3') | 119.7(3) |
|             |          | C(4')-C(5')-C(6') | 120.4(3) |
|             |          | C(5')-C(6')-C(1') | 121.2(3) |
|             |          | C(3')-O(2)-C(9)   | 117.7(3) |

---

**Table ESI-4.** Anisotropic displacement parameters ( $\text{\AA}^2 \times 10^3$ ) for compound **2**. The anisotropic displacement factor exponent takes the form:  $-2\pi^2[ h^2 a^{*2} U^{11} + \dots + 2 h k a^* b^* U^{12} ]$

|       | U <sup>11</sup> | U <sup>22</sup> | U <sup>33</sup> | U <sup>23</sup> | U <sup>13</sup> | U <sup>12</sup> |
|-------|-----------------|-----------------|-----------------|-----------------|-----------------|-----------------|
| N(1)  | 27(2)           | 41(2)           | 61(2)           | -2(1)           | -4(1)           | -2(1)           |
| C(2)  | 31(2)           | 41(2)           | 73(2)           | -2(2)           | 1(2)            | -6(2)           |
| N(3)  | 33(2)           | 52(2)           | 80(2)           | -1(2)           | -4(2)           | 0(2)            |
| C(4)  | 43(3)           | 48(2)           | 117(3)          | -12(2)          | -8(2)           | 7(2)            |
| C(5)  | 45(3)           | 43(2)           | 108(3)          | -19(2)          | -3(2)           | -2(2)           |
| C(6)  | 31(2)           | 48(2)           | 53(2)           | 2(2)            | 7(2)            | -2(2)           |
| O(1)  | 40(2)           | 41(1)           | 87(2)           | 0(1)            | 2(1)            | -1(1)           |
| C(7)  | 35(2)           | 43(2)           | 60(2)           | -4(2)           | -1(2)           | -4(2)           |
| C(8)  | 36(2)           | 43(2)           | 60(2)           | 5(2)            | 4(2)            | 1(2)            |
| C(1') | 26(2)           | 39(2)           | 56(2)           | 4(2)            | 0(2)            | 1(2)            |
| C(2') | 39(2)           | 40(2)           | 57(2)           | -6(2)           | 3(2)            | -5(2)           |
| C(3') | 29(2)           | 44(2)           | 58(2)           | 3(2)            | 7(2)            | 7(2)            |
| C(4') | 35(2)           | 41(2)           | 63(2)           | -2(2)           | -2(2)           | -2(2)           |
| C(5') | 39(3)           | 40(2)           | 68(2)           | -8(2)           | -3(2)           | 6(2)            |
| C(6') | 33(2)           | 48(2)           | 61(2)           | -1(2)           | 1(2)            | 7(2)            |
| O(2)  | 34(2)           | 51(2)           | 100(2)          | -15(1)          | 11(1)           | 1(1)            |
| C(9)  | 66(3)           | 52(2)           | 83(3)           | -15(2)          | 14(2)           | 7(2)            |
| O(3)  | 37(2)           | 54(2)           | 117(2)          | -25(2)          | -7(2)           | -2(1)           |
